# Supplementary material for: Embryonic geometry underlies phenotypic variation in decanalized conditions
Source: eLife journal article supplement (doi:10.7554/elife.47380), 2020-02-12
Supplement: supp [file elife-47380-supp-v1.zip]

Archive with 11 entries (11 files):
- elife_poa_e47380_Figure_5_figure_supplement_3.pdf
- elife_poa_e47380_Transparent_Reporting_File.pdf
- elife_poa_e47380_Figure_1_figure_supplement_1.pdf
- elife_poa_e47380_Video_2.mov
- elife_poa_e47380_Figure_3_figure_supplement_1.pdf
- elife_poa_e47380_Figure_5_figure_supplement_1.pdf
- elife_poa_e47380_Video_3.mov
- elife_poa_e47380_Figure_5_figure_supplement_2.pdf
- elife_poa_e47380_Figure_6_figure_supplement_2.pdf
- elife_poa_e47380_Video_1.mov
- elife_poa_e47380_Figure_6_figure_supplement_1.pdf
