# Supplementary figures and images for: Embryonic geometry underlies phenotypic variation in decanalized conditions
Source: eLife journal article supplement (doi:10.7554/elife.47380), 2020-02-12

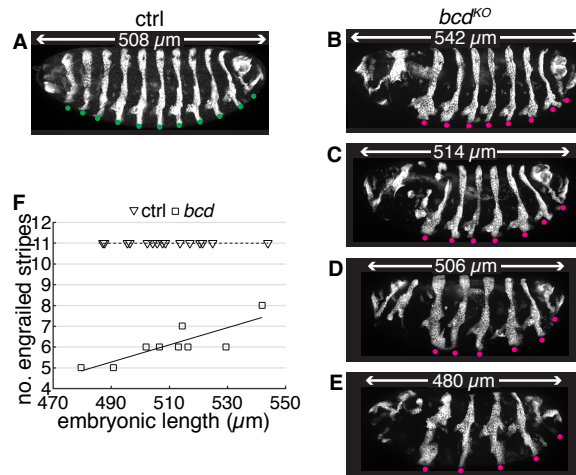

Supplement: supp [file elife-47380-supp-v1.zip › elife_poa_e47380_Figure_5_figure_supplement_3.pdf]

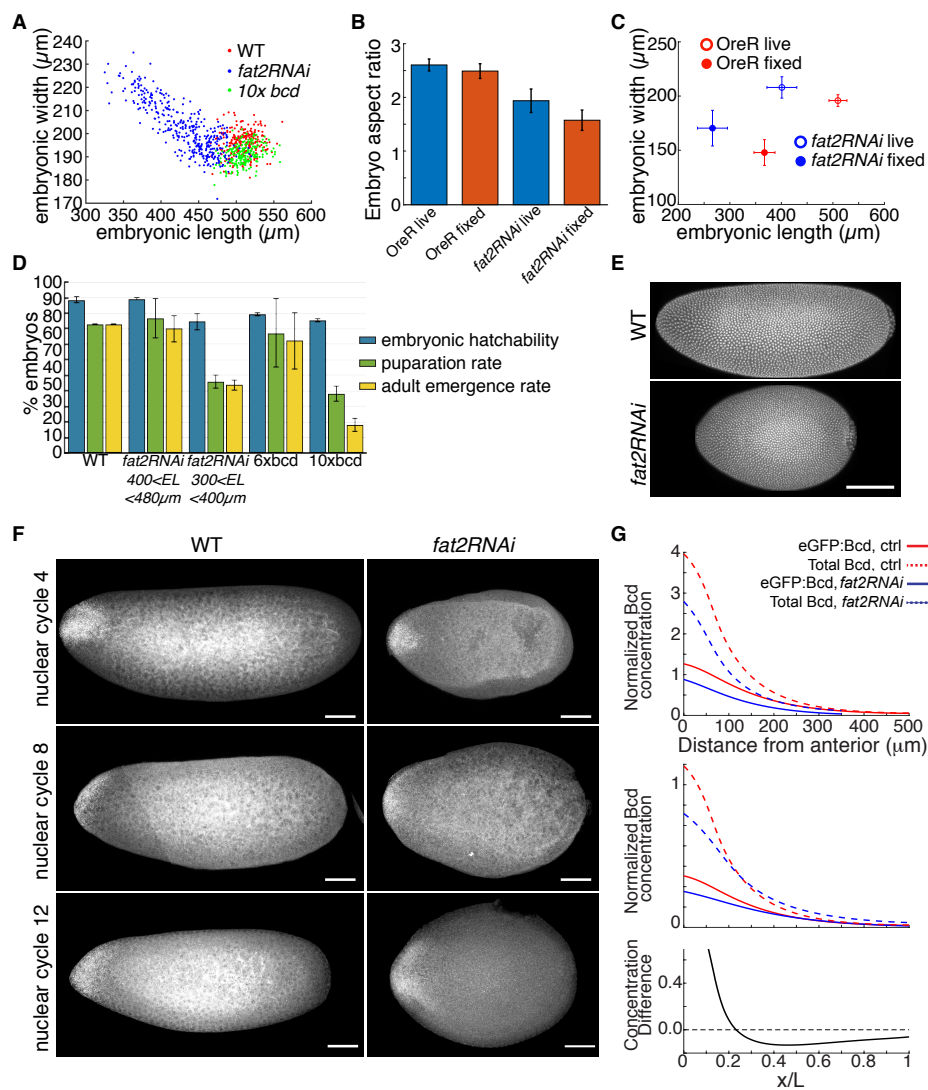

Supplement: supp [file elife-47380-supp-v1.zip › elife_poa_e47380_Figure_1_figure_supplement_1.pdf]

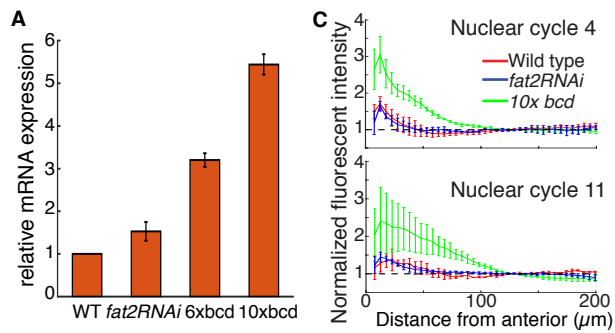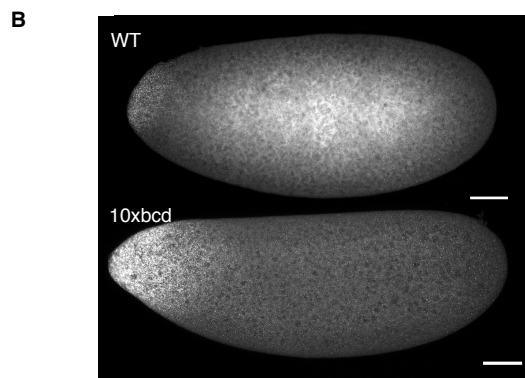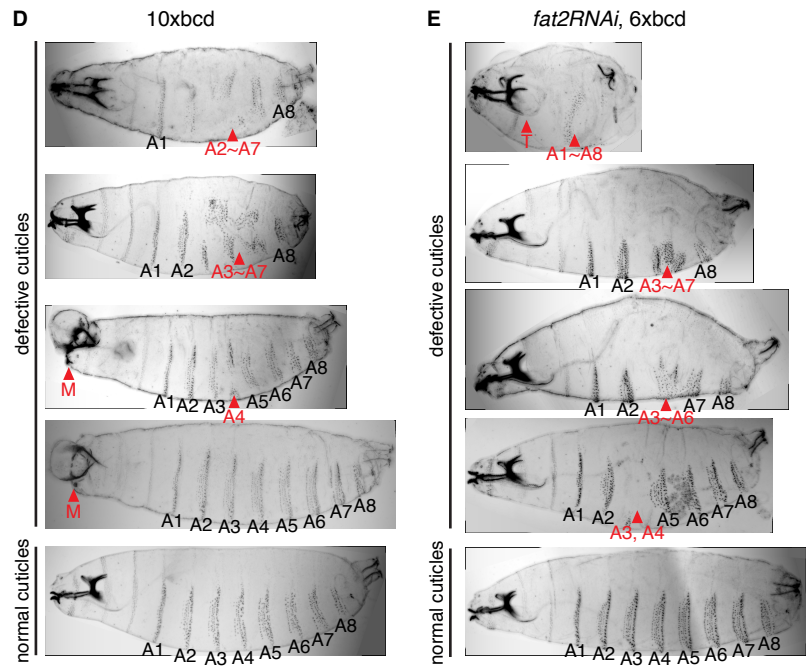

Supplement: supp [file elife-47380-supp-v1.zip › elife_poa_e47380_Figure_3_figure_supplement_1.pdf]

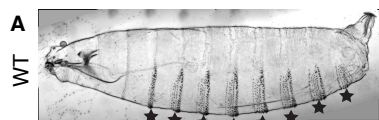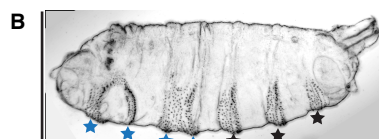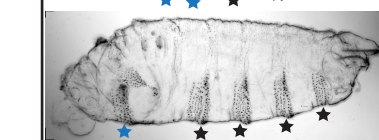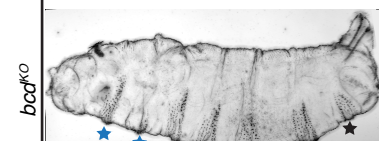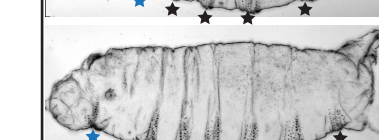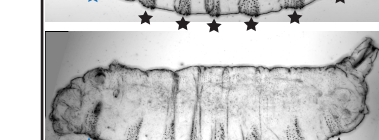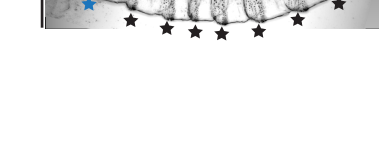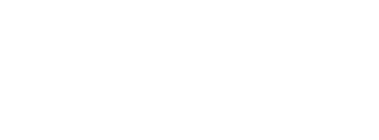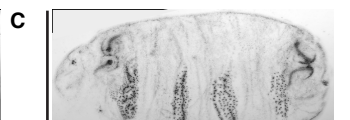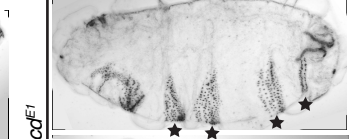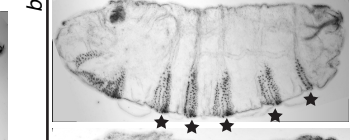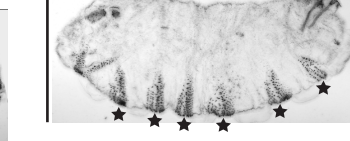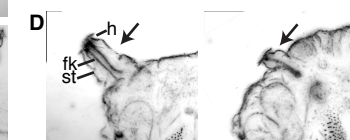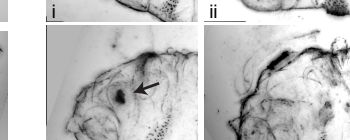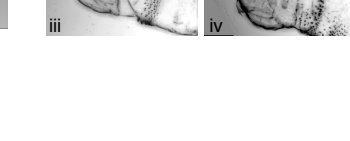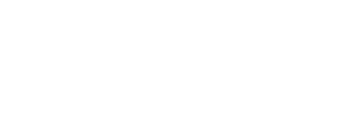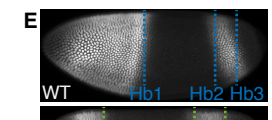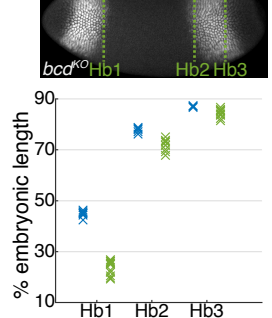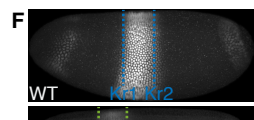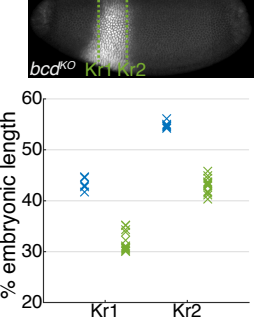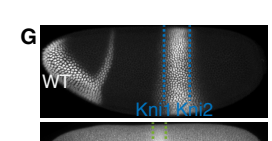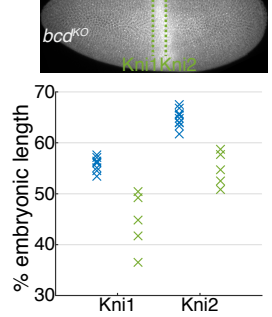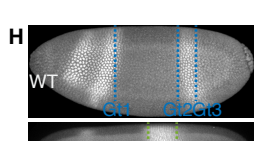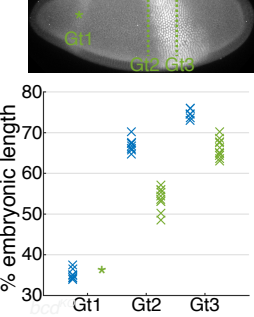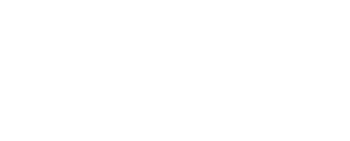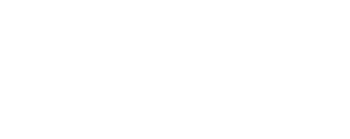

Supplement: supp [file elife-47380-supp-v1.zip › elife_poa_e47380_Figure_5_figure_supplement_1.pdf]

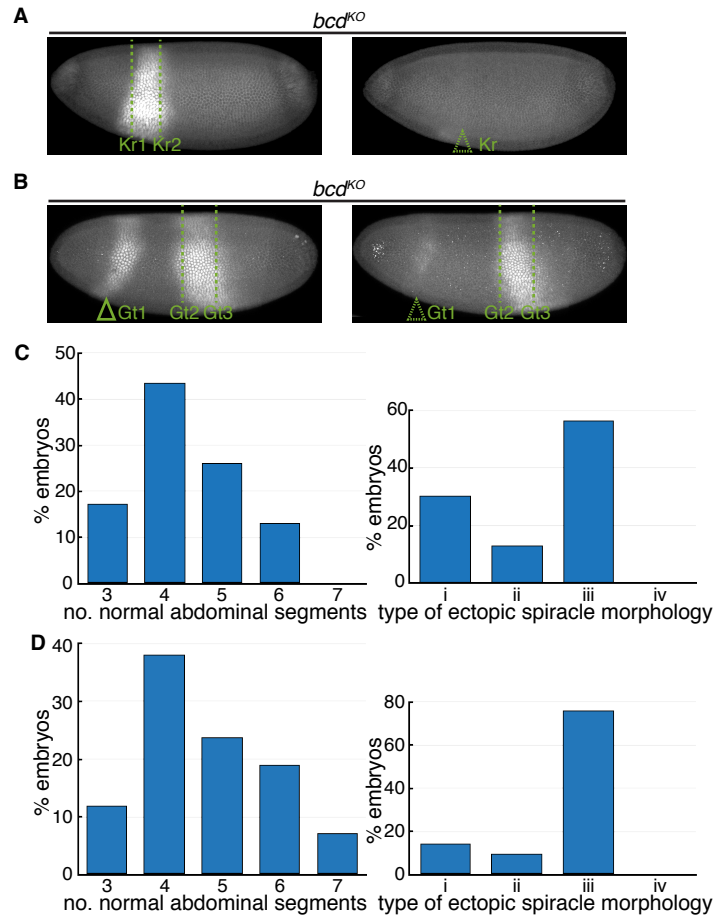

Supplement: supp [file elife-47380-supp-v1.zip › elife_poa_e47380_Figure_5_figure_supplement_2.pdf]

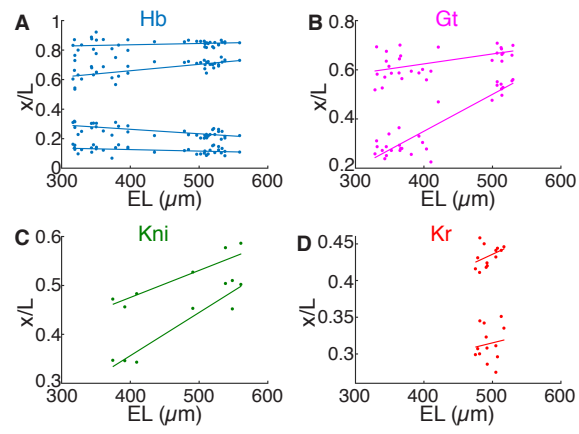

Supplement: supp [file elife-47380-supp-v1.zip › elife_poa_e47380_Figure_6_figure_supplement_2.pdf]

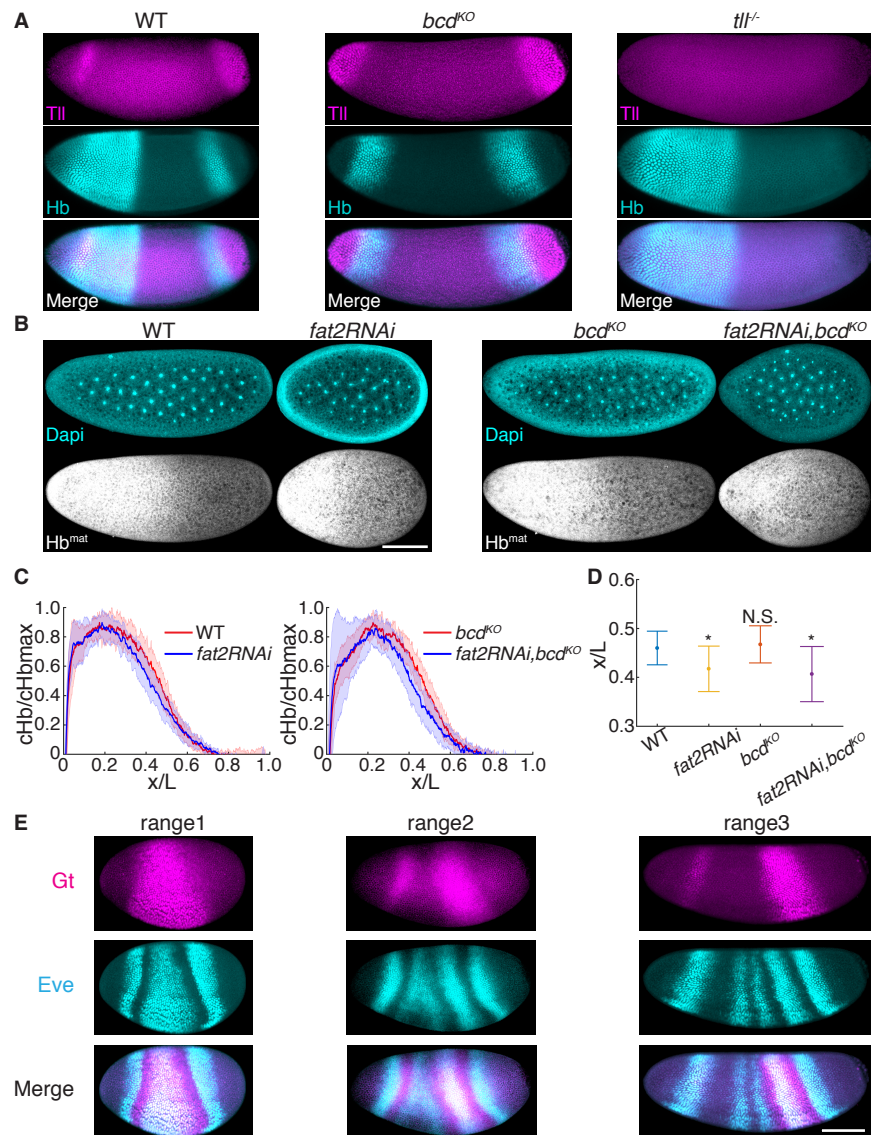

Supplement: supp [file elife-47380-supp-v1.zip › elife_poa_e47380_Figure_6_figure_supplement_1.pdf]
